# Supplementary material
Source: HighWire-hosted journal article supplement (https://gut.bmj.com/content/71/6/1141)
Supplement: inline-supplementary-material-4 [file inline-supplementary-material-4.pdf]

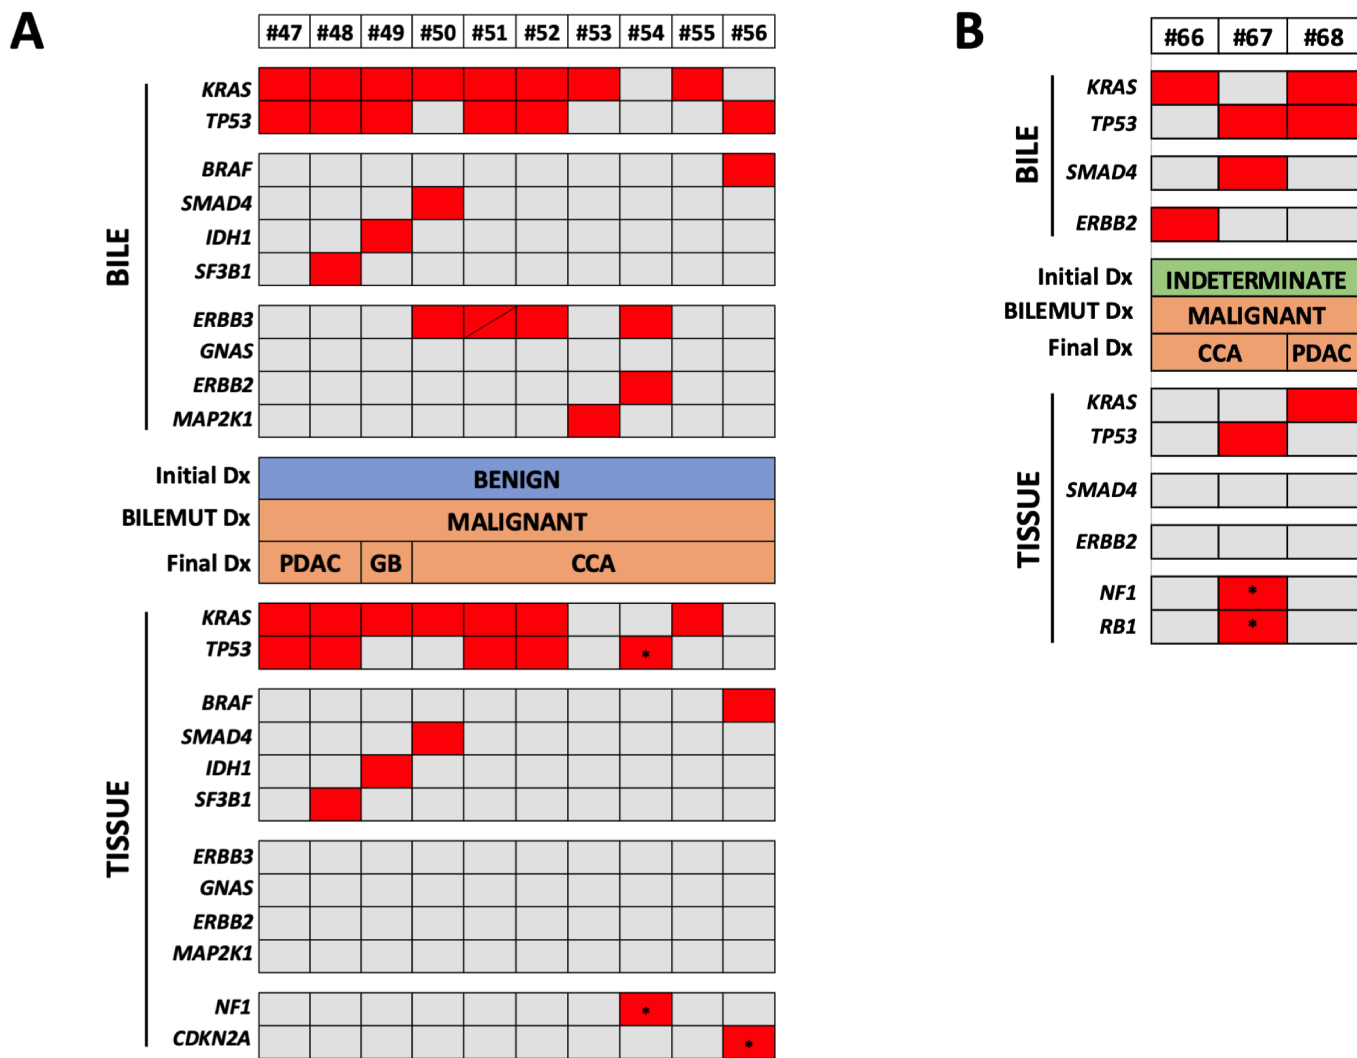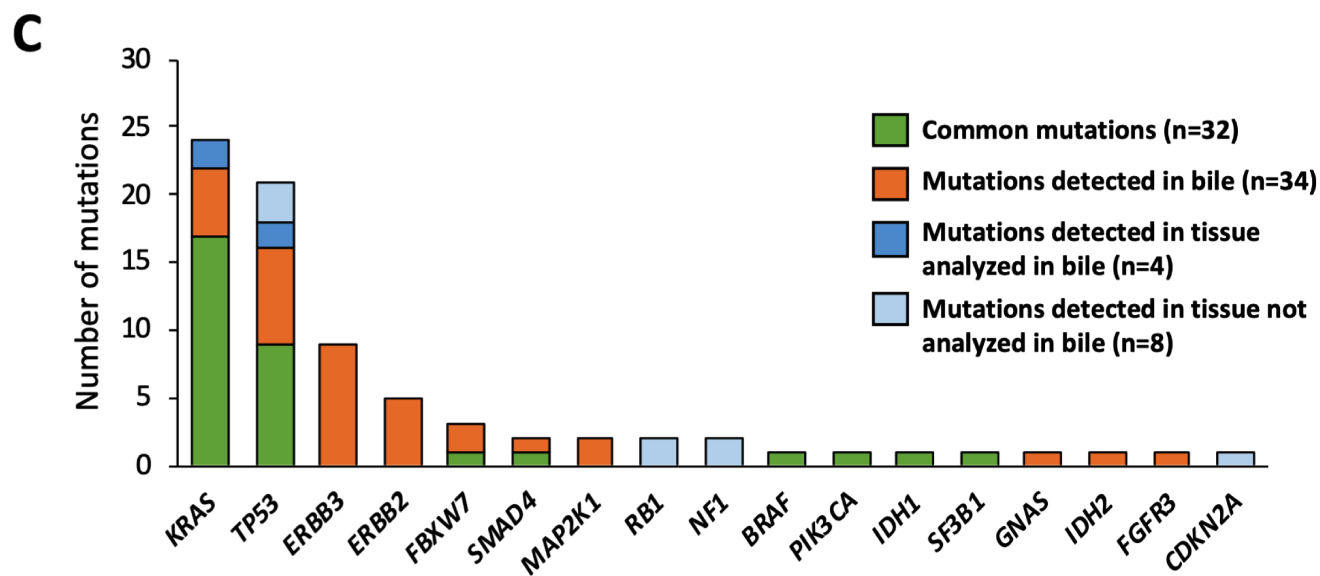

Supplementary Figure S2
