# Supplementary material
Source: HighWire-hosted journal article supplement (https://gut.bmj.com/content/71/6/1141)
Supplement: inline-supplementary-material-6 [file inline-supplementary-material-6.pdf]

**Supplementary Table S3.** List of mutations identified in the paired bile cfDNA and tissue DNA (left) or bile cfDNA (right) of each patient. Asterisk (\*) indicates the presence of actionable mutations.

| PATIENT ID | GENE NAME | BILE         |          | TISSUE         | PATIENT ID | GENE NAME | BILE      |       |
|------------|-----------|--------------|----------|----------------|------------|-----------|-----------|-------|
|            |           | MUTATIONS    |          | MUTATION       |            |           | MUTATIONS |       |
| #1         | KRAS      | G12R         |          | G12R           | #18        | KRAS      | G12R      |       |
|            | TP53      | V218E        |          | V218E          |            | TP53      | R175H     |       |
| #2         | KRAS      | G12D         |          | G12D           | #19        | KRAS      | G13D      |       |
|            | KRAS      | G12D         |          | G12D           |            | KRAS      | G12V      | G13D  |
| #3*        | FGFR3     | F384L        |          | nd             | #20*       | PIK3CA    | Q546P     |       |
|            | KRAS      | G12D         |          | G12D           |            | GNAS      | R201H     |       |
| #4*        | TP53      | na           | P151H    | R337C          |            | FBXW7     | R689W     | R505C |
|            | ERBB2     | S310F        |          | nd             |            | IDH2      | R140Q     |       |
|            | ERBB3     | V104L        |          | nd             |            | PTEN      | R173C     |       |
| #5*        | ERBB2     | G776V        |          | nd             |            | EGFR      | R451C     |       |
|            | KRAS      | G12R         |          | G12R           | RET        | R912W     | R912Q     |       |
| #6         | KRAS      | G12D         |          | G12D           | #21*       | PIK3CA    | E545K     |       |
|            | ERBB3     | V104M        | G284R    | nd             |            | ERBB3     | D297Y     |       |
| #7*        | GNAS      | R201C        |          | nd             | #22        | KRAS      | G12V      |       |
|            | KRAS      | nd           |          | G12D           |            | SMAD4     | R361C     |       |
| #8         | TP53      | nd           | C135F    | R248Q          | #23*       | ERBB3     | V104M     |       |
|            | FBXW7     | R465C        |          | nd             |            | GNAS      | R201C     |       |
| #9*        | KRAS      | G13D         |          | G13D           | #24*       | KRAS      | G12V      | Q61H  |
|            | TP53      | 723delC      | R273H    | 723delC        |            | BRAF      | G596R     |       |
|            | FBXW7     | R465C        | R689W    | R465C          | #25        | KRAS      | G12V      |       |
|            | IDH2      | R140Q        |          | nd             |            | KRAS      | G12V      |       |
|            | MAP2K1    | E203K        |          | nd             | #26*       | TP53      | R248W     |       |
|            | TP53      | na           |          | 673-2A>C       |            | BRAF      | D594G     |       |
| #10*       | PIK3CA    | E524K        |          | E542K          | #27        | TP53      | R282W     |       |
|            | ERBB2     | S310F        |          | nd             |            | #28       | KRAS      | G12V  |
| #11        | KRAS      | G12V         |          | G12V           | TP53       |           | R248W     |       |
|            | TP53      | 903delA      |          | 903delA        | #29*       | GNAS      | R201C     |       |
| KRAS       | G12D      |              | G12D     | APC            |            | R1450     |           |       |
| #12*       | TP53      | 662_663delAG |          | 662_663delAG   |            | KIT       | T670I     |       |
|            | ERBB3     | V104M        |          | nd             |            | #30       | TP53      | E285K |
| RB1        | na        |              | 1850delG | SMAD4          | R361C      |           |           |       |
| #13        | KRAS      | G12D         |          | nd             | GNAS       |           | R201H     |       |
|            | KRAS      | G12R         |          | nd             | PTEN       |           | R173C     |       |
| #15        | KRAS      | G12D         |          | nd             | APC        |           | R1114*    |       |
|            | TP53      | H193R        |          | nd             | #31*       | TP53      | M246V     |       |
| #16        | KRAS      | nd           |          | G12D           |            | #32       | KRAS      | G12V  |
|            | TP53      | nd           |          | H179Q          | PIK3CA     |           | E545K     |       |
| #47        | KRAS      | G12R         |          | G12R           | ERBB3      |           | V104L     |       |
|            | TP53      | 780delC      |          | 780delC        | GNAS       | R201H     |           |       |
| #48        | KRAS      | G12D         |          | G12D           | #33        | KRAS      | G12C      |       |
|            | TP53      | G262V        |          | G262V          |            | TP53      | R248W     |       |
|            | SF3B1     | K700E        |          | K700E          | #42        | KRAS      | G12R      |       |
| KRAS       | G12V      |              | G12V     | #43*           |            | KIT       | V530I     |       |
| #49*       | TP53      | H214R        |          |                | nd         | #44*      | KRAS      | G12V  |
|            | IDH1      | R132C        |          | R132C          | TP53       |           | E285K     | H179R |
|            | KRAS      | G12D         |          | G12D           | BRAF       |           | D594N     |       |
| #50*       | SMAD4     | R361H        |          | R361H          | GNAS       | R201H     |           |       |
|            | ERBB3     | V104M        |          | nd             | CTNNB1     | S45P      |           |       |
| #51*       | KRAS      | G12D         |          | G12D           | #45*       | KRAS      | G12D      |       |
|            | TP53      | 657delC      |          | 657delC        |            | ERBB3     | V104M     | G284R |
|            | ERBB3     | G284R        | T355I    | nd             | GNAS       | R201C     | R201H     |       |
| #52*       | KRAS      | G12R         |          | G12R           | #46*       | KRAS      | G12V      |       |
|            | TP53      | G154V        |          | G154V          |            | ERBB3     | V104M     |       |
| #53*       | ERBB3     | V104M        |          | nd             | CTNBB1     | S45F      |           |       |
|            | KRAS      | G12C         |          | nd             | KRAS       | G12V      |           |       |
| #54*       | MAP2K1    | F53I         |          | nd             | #57*       | IDH1      | R132G     |       |
|            | TP53      | na           |          | 1028_1029delAG |            | GNAS      | R201S     |       |
|            | ERBB3     | D297Y        |          | nd             | #58        | KRAS      | G12D      | Q61P  |
|            | ERBB2     | S310F        |          | nd             |            | CTNNB1    | S45P      | T41A  |
| #55        | NF1       | na           |          | R711C          | #59        | TP53      | S241F     | V173L |
|            | KRAS      | G12D         |          | G12D           |            | KRAS      | G12D      | G13D  |
| #56*       | TP53      | V173M        |          | nd             | #61*       | PIK3CA    | R93W      |       |
|            | BRAF      | G466A        |          | G466A          |            | IDH1      | R132H     |       |
| #66*       | CDKN2A    | na           |          | Y129*          |            | TP53      | R282W     |       |
|            | KRAS      | G12D         |          | nd             |            | BRAF      | V600E     |       |
| #67        | ERBB2     | V777L        |          | nd             |            | PTEN      | R173C     |       |
|            | TP53      | S241F        |          | S241F          |            | EGFR      | R451C     |       |
|            | NF1       | na           |          | E1387G         | MET        | R988C     |           |       |
|            | RB1       | na           |          | 1332+2T>C      | MTOR       | R2217W    |           |       |
| #68        | SMAD4     | R361C        |          | nd             | #63*       | KRAS      | G12D      |       |
|            | KRAS      | G12D         |          | G12D           |            | TP53      | Y220C     |       |
| #65        | TP53      | R273H        |          | nd             | ERBB3      | V104M     |           |       |
|            | #64*      | FGFR2        | A648T    |                | #65        | KRAS      | G12D      |       |
|            |           | KRAS         | G12D     |                |            | TP53      | R248Q     |       |
| TP53       | R248Q     |              | FBXW7    | S582L          |            |           |           |       |

■ Common mutations (n=32)  
■ Mutations detected in bile (n=34)  
■ Mutations detected in tissue analyzed in bile (n=4)  
■ Mutations detected in tissue not analyzed in bile (n=8)
